# Supplementary material for: The effects of three different daily plant stanol ester intakes on influenza vaccination responses: a double-blind, randomized, placebo-controlled intervention study in older adults
Source: Royal Society of Chemistry journal article supplement (doi:10.1039/d5fo03652f), 2025-01-01
Supplement: d5fo03652f3.pdf [file d5fo03652f3.pdf]

**Supplementary Table 3.** *Results of the linear mixed model analysis for anthropometrics, comparing*

|                         |                               |                                               | <i>p-value</i>                |              |             |                     |                            |
|-------------------------|-------------------------------|-----------------------------------------------|-------------------------------|--------------|-------------|---------------------|----------------------------|
|                         | <b>Group vs Control group</b> | <b>Estimated marginal difference (95% CI)</b> | <b>Group vs Control group</b> | <b>Group</b> | <b>Time</b> | <b>Group x time</b> | <b>Time V1-vaccination</b> |
| Weight, kg              | 4 g/d                         | 0.12 (-0.24, 0.49)                            | N/A                           | 0.05         | 0.25        | N/A                 | N/A                        |
|                         | 3 g/d                         | 0.05 (-0.31, 0.40)                            | N/A                           |              |             |                     |                            |
|                         | 2 g/d                         | -0.37 (-0.74, 0.00)                           | N/A                           |              |             |                     |                            |
| BMI, kg/m <sup>2</sup>  | 4 g/d                         | 0.05 (-0.08, 0.18)                            | N/A                           | 0.06         | 0.31        | N/A                 | N/A                        |
|                         | 3 g/d                         | 0.02 (-0.10, 0.15)                            | N/A                           |              |             |                     |                            |
|                         | 2 g/d                         | -0.12 (-0.25, 0.01)                           | N/A                           |              |             |                     |                            |
| Waist circumference, cm | 4 g/d                         | 0.18 (-0.42, 0.79)                            | N/A                           | 0.69         | 0.10        | N/A                 | N/A                        |
|                         | 3 g/d                         | -0.05 (-0.63, 0.54)                           | N/A                           |              |             |                     |                            |
|                         | 2 g/d                         | -0.19 (-0.80, 0.42)                           | N/A                           |              |             |                     |                            |
| Hip circumference, cm   | 4 g/d                         | 0.08 (-0.46, 0.62)                            | N/A                           | 0.84         | 0.05        | N/A                 | N/A                        |
|                         | 3 g/d                         | 0.14 (-0.40, 0.67)                            | N/A                           |              |             |                     |                            |
|                         | 2 g/d                         | 0.25 (-0.31, 0.81)                            | N/A                           |              |             |                     |                            |
| WHR                     | 4 g/d                         | -0.00 (-0.01, 0.01)                           | N/A                           | 0.20         | 0.99        | N/A                 | N/A                        |
|                         | 3 g/d                         | -0.01 (-0.02, 0.00)                           | N/A                           |              |             |                     |                            |
|                         | 2 g/d                         | -0.01 (-0.02, 0.00)                           | N/A                           |              |             |                     |                            |

*changes over time between the three intervention groups and the control group.*

All models were corrected for gender and baseline concentrations. Abbreviations: 95%CI= 95% confidence interval, Time V1-vaccination = time between the start of the study and the influenza vaccination date (this variable differed per participant and therefore was tested in all models), N/A=not applicable, BMI=Body Mass Index, WHR=waist-to-hip ratio. If Group x time or Time V1-vaccination was N/A this variable was not included in the final model because it did not reach significance. If group was not significant, N/A is shown for the group vs group comparison.
